# Supplementary material for: Sea ice and millennial-scale climate variability in the Nordic seas 90 kyr ago to present
Source: PubMed Central journal article supplement (PMC4963477; doi:10.1038/ncomms12247), 2016-07-26
Supplement: ncomms12247-s1.pdf [file ncomms12247-s1.pdf]

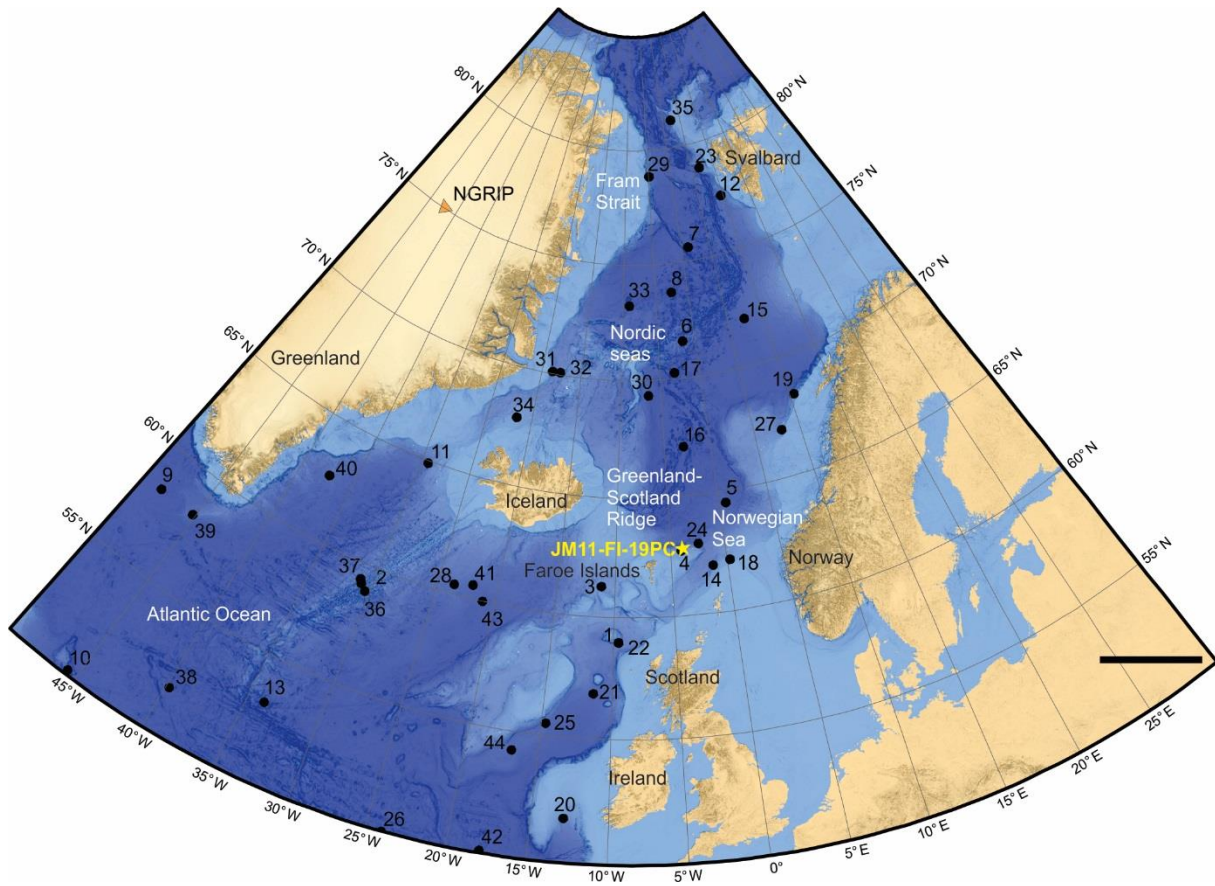

**Supplementary Figure 1. Locations of cores used in reconstruction of sea ice in the northern North Atlantic and Nordic seas.** The numbers refer to the numbers listed in Supplementary Table 1. A yellow asterisk marks the investigated core JM11-FI-19PC. The location of the North Greenland ice core (NGRIP) is indicated by an orange triangle. Bathymetry from GEBCO 2014 grid (<http://www.gebco.net/>). Scale bar represents 500 km.

**Supplementary Table 1. Core names, positions and references for published records shown in Supplementary Fig. 1 and used for the reconstruction of sea ice shown in Fig. 7a-d.**

| No | Core name     | Proxy for temperature                                                                            | Reference  |
|----|---------------|--------------------------------------------------------------------------------------------------|------------|
| 1  | DAPC-02       | % <i>N. pachyderma</i> s IRD, planktic isotopes                                                  | 1          |
| 2  | DS97-2P       | % <i>N. pachyderma</i> s, $\delta^{18}\text{O}$ , foraminiferal SST, IRD                         | 2, 3       |
| 3  | ENAM33        | % <i>N. pachyderma</i> s, IRD, planktic isotopes                                                 | 4          |
| 4  | ENAM93-21     | % <i>N. pachyderma</i> s, IRD, planktic $\delta^{18}\text{O}$                                    | 5          |
| 5  | HM52-43       | Planktic $\delta^{18}\text{O}$ , diatom SST                                                      | 6          |
| 6  | HM94-13       | Planktic $\delta^{18}\text{O}$ , diatom SST                                                      | 6          |
| 7  | HM94-25       | Planktic $\delta^{18}\text{O}$ , SST                                                             | 7          |
| 8  | HM94-34       | Planktic $\delta^{18}\text{O}$ , SST                                                             | 7          |
| 9  | HU-90-013-013 | Planktic $\delta^{18}\text{O}$ , dinoflagellate SST, and sea ice                                 | 8, 9       |
| 10 | HU-91-045-094 | Planktic $\delta^{18}\text{O}$ , dinoflagellate SST, and sea ice                                 | 8, 9       |
| 11 | JM96-1225     | % <i>N. pachyderma</i> s, planktic $\delta^{18}\text{O}$ , IRD                                   | 10         |
| 12 | JM04-025PC    | $\delta^{18}\text{O}$ , IRD                                                                      | 11         |
| 13 | JPC-13        | Planktic $\delta^{18}\text{O}$ , IRD                                                             | 12         |
| 14 | LINK17        | % <i>N. pachyderma</i> s, planktic $\delta^{18}\text{O}$                                         | 13         |
| 15 | M17730        | Planktic $\delta^{18}\text{O}$ , foraminiferal SST                                               | 7          |
| 16 | M23071        | Planktic $\delta^{18}\text{O}$ , foraminiferal SST                                               | 7          |
| 17 | M23259        | Planktic $\delta^{18}\text{O}$ , foraminiferal SST                                               | 7          |
| 18 | MD99-2284     | Planktic $\delta^{18}\text{O}$ , IRD, foraminiferal SST                                          | 14         |
| 19 | MD99-2294     | % <i>N. pachyderma</i> s, planktic $\delta^{18}\text{O}$ , IRD, foraminiferal SST                | 15         |
| 20 | MD01-2461     | % <i>N. pachyderma</i> s, planktic $\delta^{18}\text{O}$ , IRD, foraminiferal SST                | 16         |
| 21 | MD04-2822     | % <i>N. pachyderma</i> s, IRD                                                                    | 17         |
| 22 | MD04-2829CQ   | % <i>N. pachyderma</i> s, planktic $\delta^{18}\text{O}$ , foraminiferal SST                     | 18         |
| 23 | MSM5/5-712-2  | IP <sub>25</sub> , P <sub>B</sub> IP <sub>25</sub> and P <sub>D</sub> IP <sub>25</sub>           | 19         |
| 24 | NA81-10       | % <i>N. pachyderma</i> s, planktic $\delta^{18}\text{O}$ , IRD                                   | 20         |
| 25 | NA87-22       | Planktic $\delta^{18}\text{O}$ , IRD, foraminiferal SST                                          | 21         |
| 26 | ODP Site 609  | % <i>N. pachyderma</i> s, planktic $\delta^{18}\text{O}$                                         | 22         |
| 27 | ODP Site 644  | % <i>N. pachyderma</i> s, planktic $\delta^{18}\text{O}$ , IRD                                   | 23         |
| 28 | ODP Site 983  | % <i>N. pachyderma</i> s, IRD                                                                    | 24         |
| 29 | PS1230        | % <i>N. pachyderma</i> s, planktic $\delta^{18}\text{O}$ , IRD                                   | 25         |
| 30 | PS1243        | % <i>N. pachyderma</i> s, planktic $\delta^{18}\text{O}$ , IRD                                   | 25         |
| 31 | PS1726        | Planktic $\delta^{18}\text{O}$ , IRD                                                             | 26         |
| 32 | PS1730        | Planktic $\delta^{18}\text{O}$ , IRD                                                             | 27, 28     |
| 33 | PS1878        | % <i>N. pachyderma</i> s, planktic $\delta^{18}\text{O}$ , IRD                                   | 29         |
| 34 | PS2644        | % <i>N. pachyderma</i> s, planktic $\delta^{18}\text{O}$ , IRD                                   | 30         |
| 35 | PS2837-5      | IP <sub>25</sub> , PIP <sub>25</sub>                                                             | 31         |
| 36 | SO82-02GGC    | Planktic $\delta^{18}\text{O}$ , IRD, foraminiferal SST                                          | 32         |
| 37 | SO82-05GGC    | % <i>N. pachyderma</i> s, planktic $\delta^{18}\text{O}$ , IRD, foraminiferal SST                | 33, 34     |
| 38 | SU90-12       | Isotopes, IRD, foraminiferal SST                                                                 | 21         |
| 39 | SU90-16       | Isotopes, IRD, foraminiferal SST                                                                 | 21         |
| 40 | SU90-24       | Foraminiferal SST, IRD                                                                           | 35         |
| 41 | SU90-33       | Planktic $\delta^{18}\text{O}$ , IRD, foraminifera SST                                           | 21         |
| 42 | SU90-44       | Planktic $\delta^{18}\text{O}$ , IRD, foraminifera SST                                           | 21         |
| 43 | V29-202       | % <i>N. pachyderma</i> s, planktic $\delta^{18}\text{O}$ , IRD                                   | 36         |
| 44 | VM23-81       | % <i>N. pachyderma</i> s                                                                         | 22         |
|    | NGRIP         |                                                                                                  | 37, 38     |
|    | JM11-FI-19PC  | IP <sub>25</sub> , P <sub>B</sub> IP <sub>25</sub> and P <sub>D</sub> IP <sub>25</sub> , diatoms | This study |

**Supplementary Table 2: Tephra layers, GICC05 ages and depth of occurrence in NGRIP ice core and marine core JM11-FI-19PC.** \* FMAZ-III was excluded from the age model as Griggs *et al.* (ref. 39) found, that in marine records this layer is a mixture of the tephra from numerous volcanic eruptions. \*\* FMAZ-IV is located in the lower part of IS12<sup>40</sup>. It has not yet been located in the NGRIP ice core and has therefore not been used in the age model; although Griggs *et al.* (ref. 39) found, that it can be used as isochron for high-precision correlations. \*\*\* Ash Zone II (Z2) has not been used in the age model, as the peak in counted shards has not been considered distinctive enough<sup>40</sup>. \*\*\*\* Due to its wide range in age, the 5a5a-Top/BAS-I tephra layer has not been included in the final age model; although identified in all cores used in this study. Nevertheless, all listed tephra layers have been used for formal correlation (Fig. 2). Depth marked with <sup>▲</sup> were determined/approved by counting micro-tephra shards whilst identifying/counting diatom species.

| Reference horizon                 | GICC05 age $\pm 1\sigma$<br>(yr b2k) | NGRIP depth<br>(m) | Reference<br>(NGRIP) | JM11-FI-19PC<br>depth (cm) | Reference<br>(JM-11-FI-19PC) |
|-----------------------------------|--------------------------------------|--------------------|----------------------|----------------------------|------------------------------|
| Saksunarvatn tephra               | 10 347 $\pm$ 45                      | 1409.83            | 37                   | 83                         | 41                           |
| Vedde tephra /NAAZ I              | 12 171 $\pm$ 57                      | 1506.14            | 37                   | 130                        | 41                           |
| FMAZ II /<br>Fugloyarbanki tephra | 26 740 $\pm$ 390                     | 1848.05            | 42                   | 305                        | 41                           |
| FMAZ III tephra *                 | 38 122 $\pm$ 723                     | 2066.95            | 38                   | 427-428<br>438-439         | 39                           |
| FMAZ IV tephra **                 | 46 800 $\pm$ 1000                    | -                  | 40                   | 542-543                    | 39, 41                       |
| NAAZ II/<br>Z2 tephra ***         | 55 380 $\pm$ 1184                    | 2359.45            | 38                   | 620 <sup>▲</sup>           | 41, This study               |
| 5a-Top/BAS-I ****                 | 78 500 - 80 100                      | 2600.60            | 43, 44, 45           | 760 <sup>▲</sup>           | This study                   |

**Supplementary Table 3: AMS-<sup>14</sup>C dates.** Conventional and calibrated radiocarbon dates of core JM11-FI-19PC. Ages were first converted to calendar years before present (1950) using the CALIB Radiocarbon Calibration 7.0.2. Software and the Marine13 data set (including 400 year correction for surface reservoir ages)<sup>46, 47</sup>, before 50 years were added to make them comparable to the ice core time scale GICC05<sup>38</sup> in b2k (before 2000 years). ▲ Marks the depth used for establishing the age model by Ezat *et al.* (ref. 41) and in this study. All other AMS-<sup>14</sup>C dates are used to control the reliability of the age model only (Fig. 3).

| Depth (cm) | Material               | Laboratory Code | Age ( <sup>14</sup> C a yr BP) | Age (cal. yr BP) | GICC05 age (yr b2k) |
|------------|------------------------|-----------------|--------------------------------|------------------|---------------------|
| 15▲        | <i>N. pachyderma</i> s | UBA-21487       | 2229 ± 27                      | 1836 ± 41        | 1886 ± 41           |
| 40         | <i>N. pachyderma</i> s | UBA-21488       | 4570 ± 32                      | 4783 ± 53        | 4833 ± 53           |
| 70         | <i>N. pachyderma</i> s | UBA-21489       | 8083 ± 44                      | 8535 ± 59        | 8585 ± 59           |
| 130        | <i>N. pachyderma</i> s | UBA-21490       | 10905 ± 50                     | 12452 ± 93       | 12502 ± 93          |
| 150        | <i>N. pachyderma</i> s | UBA-21894       | 12186 ± 53                     | 13630 ± 117      | 13680 ± 117         |
| 195        | <i>N. pachyderma</i> s | UBA-21595       | 13493 ± 55                     | 15894 ± 368      | 15944 ± 368         |
| 230        | <i>N. pachyderma</i> s | UBA-21492       | 15786 ± 79                     | 18628 ± 69       | 18678 ± 69          |
| 305        | <i>N. pachyderma</i> s | UBA-21493       | 23962 ± 166                    | 28304 ± 202      | 28354 ± 202         |
| 350        | <i>N. pachyderma</i> s | UBA-21494       | 27459 ± 204                    | 31321 ± 117      | 31371 ± 117         |
| 430        | <i>N. pachyderma</i> s | UBA-21495       | 33614 ± 412                    | 37971 ± 593      | 38021 ± 593         |
| 555        | <i>N. pachyderma</i> s | UBA-21496       | 46045 ± 2028                   | 48640 ± 1361     | 48690 ± 1361        |

**Supplementary Table 4: MS, K/Ti, and  $\delta^{18}\text{O}$  tie-points of Interstadial (IS) onsets in core JM11-FI-19PC and the NGRIP ice core.** By re-evaluating the MS and XRF-K/Ti data, the tie-points for IS2, IS7, IS16, and IS17 could be improved compared to their original definition by Ezat *et al.* (ref. 41). The onset of IS1 was improved by also using the  $\delta^{18}\text{O}$  signal of the benthic foraminiferal species *M. barleeanus* and *C. neoteretis* (for data see ref. 41). In addition, the onset of IS8 as identified by Ezat *et al.* (ref. 41) is now also used as tie-point.

| <b>Tie points</b>  | <b>GICC05 age <math>\pm 1\sigma</math><br/>(yr b2k)</b> | <b>NGRIP<br/>depth (m)</b> | <b>Reference<br/>(NGRIP)</b> | <b>JM11-FI-19PC<br/>depth (cm)</b> | <b>Reference<br/>(JM11-FI-19PC)</b> |
|--------------------|---------------------------------------------------------|----------------------------|------------------------------|------------------------------------|-------------------------------------|
| <b>Onset IS 1</b>  | 14 692 $\pm$ 93                                         | 1604.64                    | 37, 38                       | 196                                | This study                          |
| <b>Onset IS 2</b>  | 23 340 $\pm$ 298                                        | 1793.20                    | 38, 42, 48, 49               | 272                                | This study                          |
| <b>Onset IS 3</b>  | 27 780 $\pm$ 416                                        | 1869.12                    | 38, 42, 48, 49               | 313                                | 41                                  |
| <b>Onset IS 4</b>  | 28 900 $\pm$ 449                                        | 1891.57                    | 38, 42, 48, 49               | 323                                | 41                                  |
| <b>Onset IS 5</b>  | 32 500 $\pm$ 566                                        | 1951.66                    | 38, 42, 48                   | 348                                | 41                                  |
| <b>Onset IS 6</b>  | 33 740 $\pm$ 606                                        | 1974.56                    | 38, 42, 48, 49               | 362                                | 41                                  |
| <b>Onset IS 7</b>  | 35 480 $\pm$ 661                                        | 2009.45                    | 38, 42, 48, 49               | 390                                | This study                          |
| <b>Onset IS 8</b>  | 38 220 $\pm$ 725                                        | 2070.03                    | 38, 48, 49                   | 441                                | 41, This study                      |
| <b>Onset IS 10</b> | 41 460 $\pm$ 817                                        | 2124.03                    | 38, 42, 48, 49               | 486                                | 41                                  |
| <b>Onset IS 11</b> | 43 340 $\pm$ 868                                        | 2157.49                    | 38, 49                       | 513                                | 41                                  |
| <b>Onset IS 12</b> | 46 860 $\pm$ 956                                        | 2222.30                    | 38, 49                       | 545                                | 41                                  |
| <b>Onset IS 13</b> | 49 280 $\pm$ 1015                                       | 2256.90                    | 38, 49                       | 567                                | 41                                  |
| <b>Onset IS 14</b> | 54 220 $\pm$ 1150                                       | 2345.52                    | 38, 49                       | 590                                | 41                                  |
| <b>Onset IS 15</b> | 55 800 $\pm$ 1196                                       | 2366.32                    | 38, 49                       | 625                                | 41                                  |
| <b>Onset IS 16</b> | 58 280 $\pm$ 1256                                       | 2402.55                    | 38, 49                       | 637                                | This study                          |
| <b>Onset IS 17</b> | 59 440 $\pm$ 1287                                       | 2420.44                    | 38, 49                       | 668                                | This study                          |
| <b>Onset IS 18</b> | 64 100 $\pm$ ?                                          | 2465.85                    | 37, 49                       | 688                                | This study                          |
| <b>Onset IS 19</b> | 72 340 $\pm$ ?                                          | 2535.96                    | 37, 49                       | 716                                | This study                          |
| <b>Onset IS 20</b> | 76 440 $\pm$ ?                                          | 2580.13                    | 37, 49                       | 737                                | This study                          |
| <b>Onset IS 21</b> | 85 060 $\pm$ ?                                          | 2691.13                    | 49                           | 788                                | This study                          |

## Supplementary References

1. Knutz, P. C., Zahn, R. & Hall, I. R. Centennial-scale variability of the British Ice Sheet: implications for climate forcing and Atlantic meridional overturning circulation during the last deglaciation. *Paleoceanogr.* **22**, PA1207, doi: 10.1029/2006PA001298 (2007).
2. Rasmussen, T. L., Thomsen, E., Troelstra, S. R., Kuijpers, A. & Prins, M. A. Millennial-scale glacial variability versus Holocene stability: changes in planktic and benthic foraminifera faunas and ocean circulation in the North Atlantic during the last 60 000 years. *Mar. Micropal.* **47**, 143–176 (2003).
3. Jonkers, L. *et al.* A reconstruction of sea surface warming in the northern North Atlantic during MIS 3 ice-rafting events. *Quat. Sci. Rev.* **29**, 1791–1800 (2010).
4. Rasmussen, T. L. & Thomsen, E. The role of the North Atlantic Drift in the millennial timescale glacial climate fluctuations. *Palaeogeogr., Palaeoclim., Palaeoecol.* **210**, 101–116 (2004).
5. Rasmussen, T. L., Thomsen, E., Labeyrie, L. & van Weering, T. C. E. Circulation changes in the Faeroe-Shetland Channel correlating with cold events during the last glacial period (58–10 ka). *Geology* **24**, 937–940 (1996).
6. Koç, N., Jansen, E. & Haflidason, H. Paleoceanographic reconstructions of surface ocean conditions in the Greenland, Iceland and Norwegian Seas through the last 14ka based on diatoms. *Quat. Sci. Rev.* **12**, 115–140 (1993).
7. Sarnthein, M. *et al.* Variations in Atlantic surface ocean paleoceanography, 50°–80°N: a time-slice record of the last 30,000 years. *Paleoceanogr.* **10**, 1063–1094 (1995).
8. Stoner, J. S., Channell, J. E. T. & Hillaire-Marcel, C. A 200 ka geomagnetic chronostratigraphy for the Labrador Sea: indirect correlation of the sediment record to SPECMAP. *Earth Planet. Sci. Lett.* **159**, 165–181 (1998).
9. De Vernal, A. & Hillaire-Marcel C. Sea-ice cover, sea-surface salinity and halo-/thermocline structure of the northwest North Atlantic: modern versus full glacial conditions. *Quat. Sci. Rev.* **19**, 65–85 (2000).
10. Hagen, S. & Hald, M. Variation in surface and deep water circulation in the Denmark Strait, North Atlantic, during marine isotope stages 3 and 2. *Paleoceanogr.* **14**, 1061, doi: 10.1029/2001PA000632 (2002).
11. Jessen, S. P. & Rasmussen, T. L. Sortable silt cycles in Svalbard slope sediments 74–0 ka. *J. Quat. Sci.* **30**, 743–753 (2015).
12. Hodell, D. A., Evans, H. F., Channell, J. E. T. & Curtis, J. H. Phase relationships of North Atlantic ice-rafted debris and surface-deep climate proxies during the last glacial period. *Quat. Sci. Rev.* **29**, 3875–3886 (2010).
13. Rasmussen, T. L. & Thomsen, E. Warm Atlantic surface water inflow to the Nordic seas 34–10 calibrated ka B.P. *Paleoceanogr.* **23**, PA1201, doi: 10.1029/2007PA001453 (2008).
14. Dokken, T. M., Nisancioglu, K. H., Li, C., Battisti, D. S. & Kissel, C. Dansgaard-Oeschger cycles: interactions between ocean and sea ice intrinsic to the Nordic seas. *Paleoceanogr.* **28**, 491–502, doi:10.1002/palo.20042 (2013).
15. Rørvik, K. -L., Rasmussen, T. L., Hald, M. & Husum, K. Intermediate water ventilation in the Nordic seas during MIS 2. *Geophys. Res. Lett.* **40**, 1–6, doi:10.1002/grl.50325 (2013).
16. Peck, V. L., Hall, I. R., Zahn, R. & Elderfield, H. Millennial-scale surface and subsurface paleothermometry from the northeast Atlantic, 55–8 ka BP. *Paleoceanogr.* **23**, PA3221, doi: 10.1029/2008PA001631 (2008).

17. Hibbert, F. D., Austin, W. E. N., Leng, M. J. & Gatlif, R. W. British Ice Sheet dynamics inferred from North Atlantic ice-rafted debris records spanning the last 175 000 years. *J. Quat. Sci.* **25**, 461–482 (2010).
18. Hall, I. R., Colmenero-Hidalgo, E., Zahn, R., Peck, V. L. & Hemming, S. R. Centennial- to millennial-scale ice-ocean interactions in the subpolar northeast Atlantic 18–41 kyr ago. *Paleoceanogr.* **26**, PA2224, doi: 10.1029/2010PA002084 (2011).
19. Müller, J. & Stein, R. High-resolution record of late glacial and deglacial sea ice changes in Fram Strait corroborates ice-ocean interactions during abrupt climate shifts. *Earth Plan. Sci. Lett.* **403**, 446–455 (2014).
20. Rasmussen, T. L., Van Weering, T. C. E. & Labeyrie, L. High resolution stratigraphy of the Faeroe-Shetland Channel and its relation to North Atlantic paleoceanography: the last 87 kyr. *Mar. Geol.* **131**, 75–88 (1996b).
21. Cortijo, E. *et al.* Changes in sea surface hydrology associated with Heinrich event 4 in the North Atlantic Ocean between 40° and 60°N. *Earth Plan. Sci. Lett.* **146**, 29–45 (1997).
22. Bond, G. *et al.* Correlations between climate records from North Atlantic sediments and Greenland ice. *Nature* **365**, 143–147 (1993).
23. Fronval, T., Jansen, E., Bloemendal, J. & Johnsen, S. J. Oceanic evidence for coherent fluctuations in Fennoscandian and Laurentide ice sheets on millennium timescales. *Nature* **374**, 443–446 (1995).
24. Barker, S. *et al.* Icebergs not the trigger for North Atlantic cold events. *Nature* **520**, 333–338 (2015).
25. Bauch, H. A. *et al.* A multiproxy reconstruction of the evolution of deep and surface waters in the subarctic Nordic seas over the last 30,000 yr. *Quat. Sci. Rev.* **20**, 659–678 (2001).
26. Stein, R., Nam, S. -I., Grobe, H. & Hubberten, H. Late Quaternary glacial history and short-term ice-rafted debris fluctuations along the East Greenland continental margin. *Geol. Soc. Spec. Publ.* **111**, 135–151 (1996).
27. Nam, S. & Stein, R. in *On the Determination of Sediment Accumulation Rates*. GeoResearch Forum Vol. 5 (eds Bruns, P. & Hass, H.C.) 223–240 (Trans Tech Publications, 1999).
28. Stein, R. *Arctic Ocean Sediments: Processes, Proxies and Paleoenvironment* (Elsevier Science, 2008).
29. Telesinski, M. M., Spielhagen, R. F. & Lind, E. A high-resolution Lateglacial and Holocene palaeoceanographic record from the Greenland Sea. *Boreas* **43**, 273–285 (2015).
30. Voelker, A. H. L. *et al.* Correlation of marine <sup>14</sup>C ages from the Nordic seas with the GISP2 isotope record: implications for <sup>14</sup>C calibration beyond 25 ka BP. *Radiocarbon* **40**, 517–534 (1998).
31. Müller, J., Massé, G., Stein, R. & Belt, S. T. Variability of sea-ice conditions in the Fram Strait over the past 30,000 years. *Nat. Geosci.* **2**, 772–776 (2009).
32. Rasmussen, T. L., Thomsen, E. & Moros, M. North Atlantic warming during Dansgaard-Oeschger events synchronous with Antarctic warming and out-of-phase with Greenland climate. *Nature Sci. Rep.* **8**, doi:10.1038/srep20535 (2016).
33. Van Kreveld, S. *et al.* Potential links between surging ice sheets, circulation changes, and the Dansgaard-Oeschger cycles in the Irminger Sea, 60–18 kyr. *Paleoceanogr.* **15**, 425–442 (2000).
34. Moros, M. *et al.* Were glacial iceberg surges in the North Atlantic triggered by climate warming? *Mar. Geol.* **192**, 393–417 (2002).

35. Elliot, M. Labeyrie, L. & Duplessy, J. -C. Changes in North Atlantic deep-water formation associated with the Dansgaard-Oeschger temperature oscillations (60–10 ka). *Quat. Sci. Rev.* **21**, 1153–1165 (2002).
36. Oppo, D. W. & Lehman, S. J. Suborbital timescale variability of North Atlantic Deep Water during the past 200,000 years. *Paleoceanography* **10**, 901–910 (1995).
37. Rasmussen, S. O. *et al.* A new Greenland ice core chronology for the last glacial termination. *J. Geophys. Res.* **111**, D06102, doi: 10.1029/2005JD006079 (2006).
38. Svensson, A. *et al.* A 60 000 year Greenland stratigraphic ice core chronology. *Clim. Past* **4**, 47–57, doi: 10.5197/cp-4-47-2008 (2008).
39. Griggs, A. J. *et al.* Optimising the use of marine tephrochronology in the North Atlantic: a detailed investigation of the Faroe Marine Ash Zones II, III, and IV. *Quat. Sci. Rev.* **106**, 122–139 (2014).
40. Wastegård, S. & Rasmussen, T. L. Faroe Marine Ash Zone IV – a new MIS3 ash zone on the Faroe Islands margin. *Geol. Soc. Spec. Publ.* **398**, 81–93 (2014).
41. Ezat, M. M., Rasmussen, T. L. & Groeneveld, J. Persistent intermediate water warming during cold stadials in the southeastern Nordic seas during the past 65 k.y. *Geology* **42**, 663–666 (2014).
42. Svensson, A. *et al.* The Greenland Ice Core Chronology 2005, 15–42 ka. Part 2: comparison to other records. *Quat. Sci. Rev.* **25**, 3258–3267 (2006).
43. Wastegård, S. & Rasmussen, T. L. New tephra horizons from Oxygen Isotope Stage 5 in the North Atlantic: correlation potential for terrestrial, marine and ice-core archives. *Quat. Sci. Rev.* **20**, 1587–1593 (2001).
44. Abbott, P. M. *et al.* Re-evaluation and extension of the Marine Isotope Stage 5 tephrostratigraphy of the Faroe Islands region: The cryptotephra record. *Palaeogeogr., Palaeoclim., Palaeoecol.* **409**, 153–168 (2014).
45. Davies, S. M. *et al.* A North Atlantic tephrostratigraphical framework for 130–60 ka b2k: new tephra discoveries, marine-based correlations, and future challenges. *Quat. Sci. Rev.* **106**, 101–121 (2014).
46. Stuiver, M. & Reimer, P. J. Extended <sup>14</sup>C database and revised CALIB radiocarbon calibration program. *Radiocarbon* **35**, 215–230 (1993).
47. Reimer, P. J. *et al.* IntCal13 and Marine13 radiocarbon age calibration curves, 0–50,000 years cal BP. *Radiocarbon* **55**, 1869–1887 (2013).
48. Andersen, K. K. *et al.* The Greenland Ice Core Chronology 2005, 15–42 ka. Part 1: constructing the time scale. *Quat. Sci. Rev.* **25**, 3246–3257 (2006).
49. Rasmussen, S. O. *et al.* A stratigraphic framework for abrupt climatic changes during the last glacial period based on three synchronized Greenland ice-core records: refining and extending the INTIMATE event stratigraphy. *Quat. Sci. Rev.* **106**, 14–28 (2014).
